# Supplementary material for: From static to semi-dynamic in vitro digestion conditions relevant for the older population: starch and protein digestion of cooked lentils
Source: Royal Society of Chemistry journal article supplement (doi:10.1039/d3fo04241c), 2023-12-15
Supplement: d3fo04241c1.pdf [file d3fo04241c1.pdf]

Appendix A

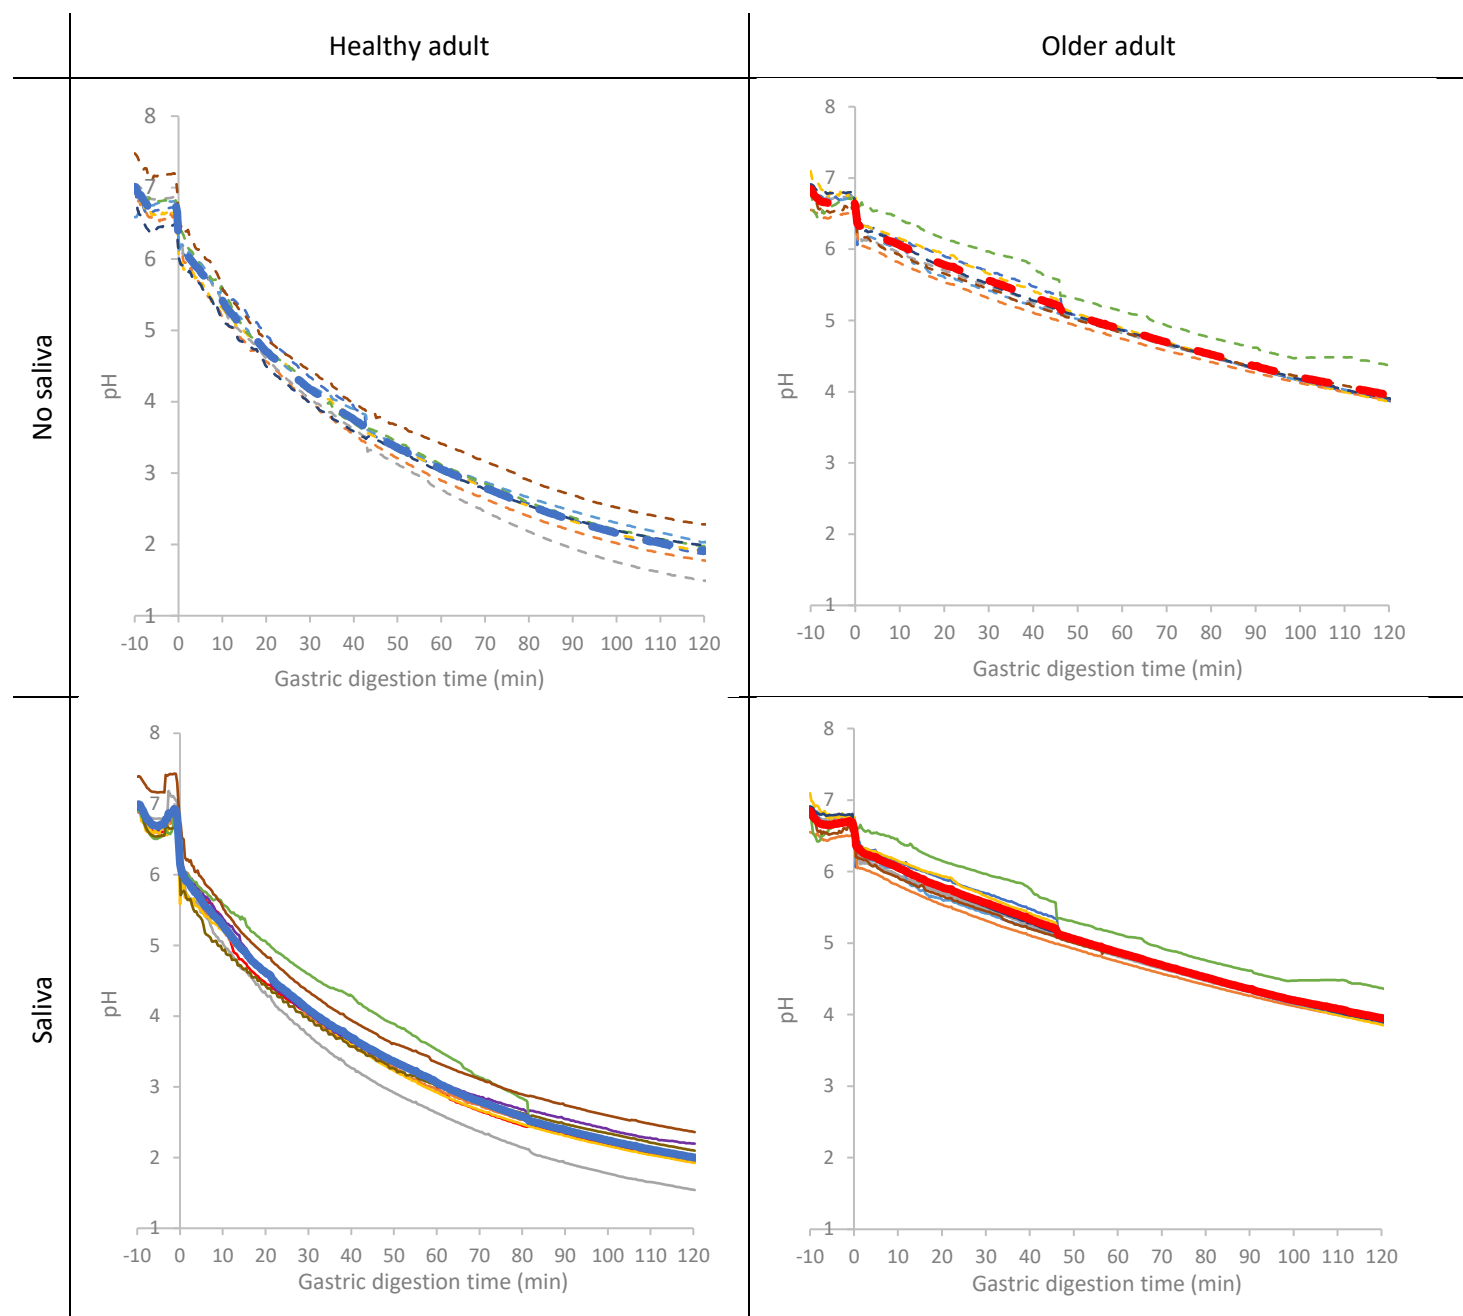

**Figure A.1:** pH profiles obtained during the gastric phase (time 0 to 120 min) of semi-dynamic digestion of cooked lentils. Each of the thin multicolored lines represent continuous pH measurements in one of the eight independent reactors. The thick line represents the average pH profile obtained for healthy adults (*blue*, reaching pH 2) and older adults (*red*, reaching pH 4). The dotted lines indicate pH profiles obtained for simulations without saliva (*top*), while full lines represent simulations with saliva addition (*bottom*).
