# Supplementary material for: From static to semi-dynamic in vitro digestion conditions relevant for the older population: starch and protein digestion of cooked lentils
Source: Royal Society of Chemistry journal article supplement (doi:10.1039/d3fo04241c), 2023-12-15
Supplement: d3fo04241c3.pdf [file d3fo04241c3.pdf]

Appendix C

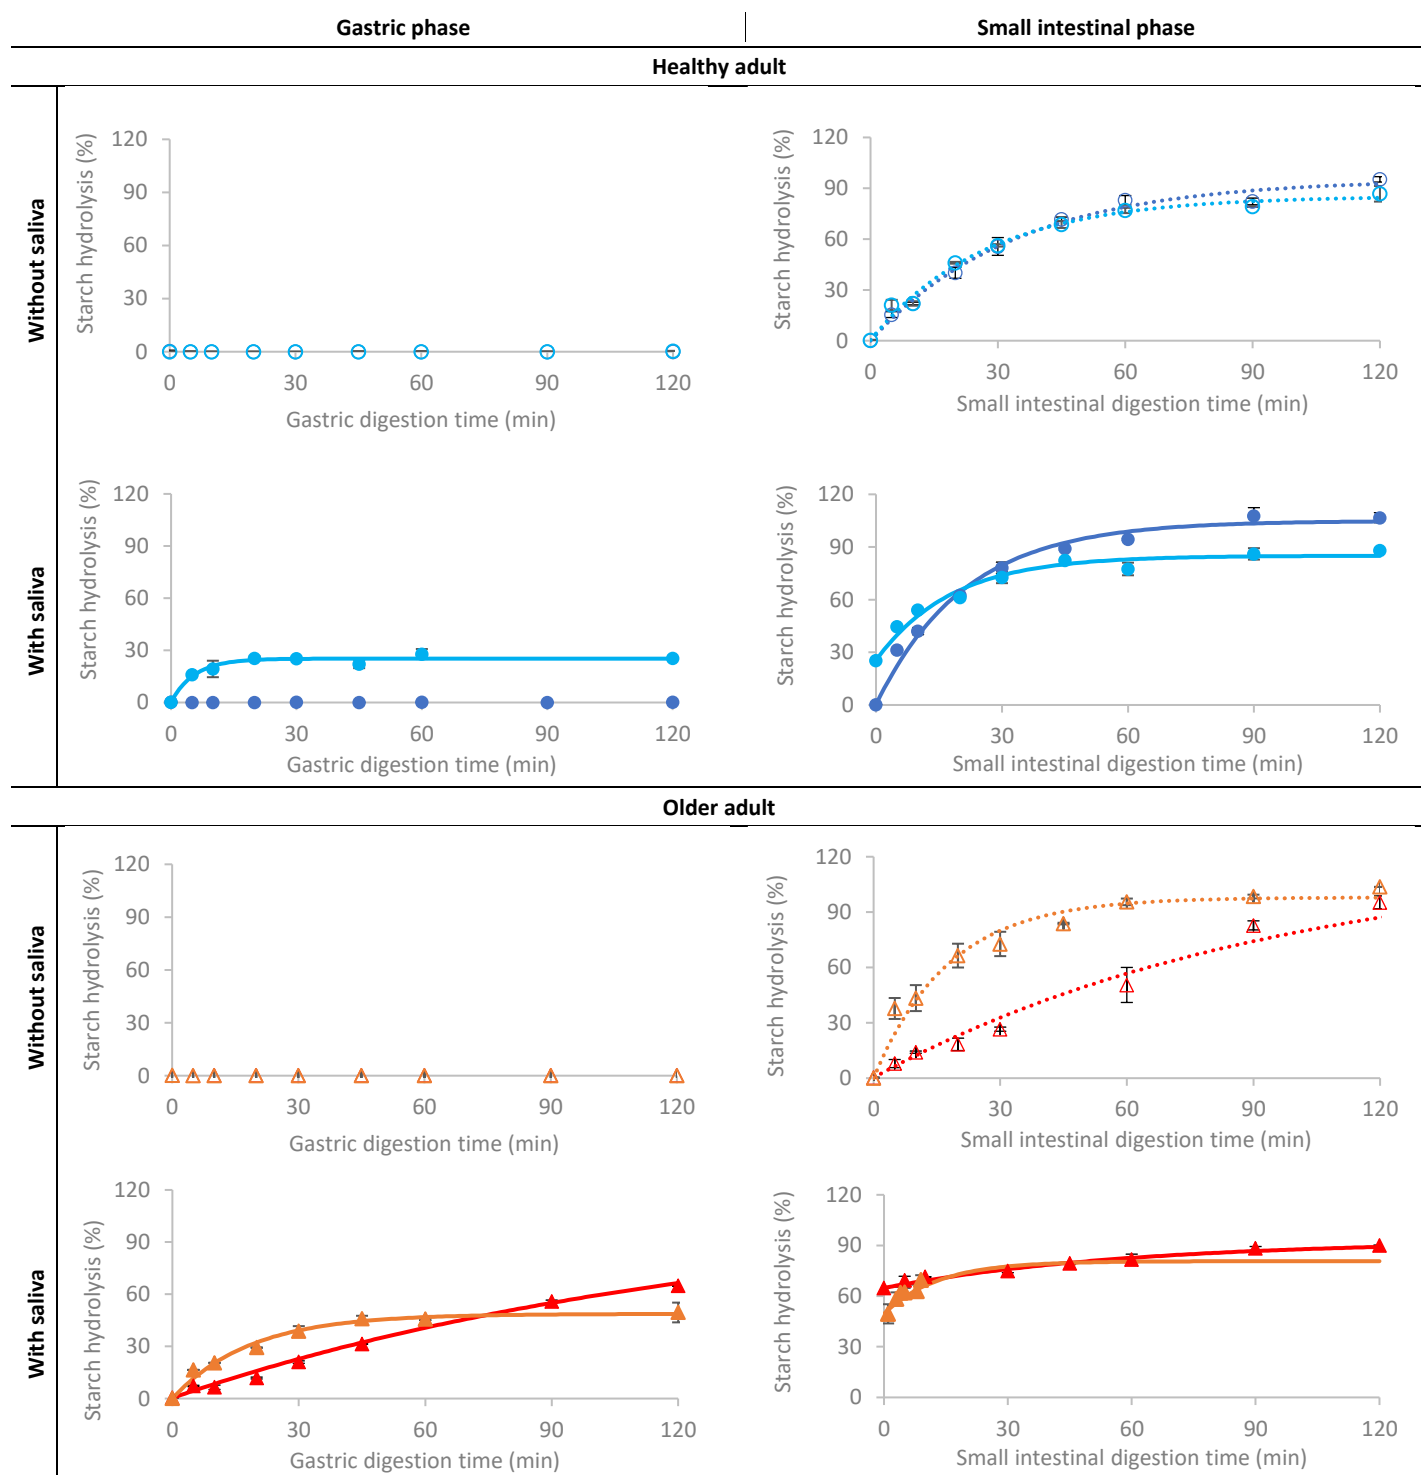

**Figure C.1:** Starch hydrolysis during gastric and small intestinal *in vitro* digestion of cooked lentils, applying models relevant for healthy adults (○/● and ◐/◑, for static and semi-dynamic models, resp.) and older adults (△/▲ and ◔/◕ for static and semi-dynamic models, resp.). Open symbols indicate simulations without addition of saliva in the oral phase, while full symbols represent simulations including saliva. The standard deviation of analytical replicates is indicated by error bars.
